# Supplementary material for: Oxidation–reduction assisted exfoliation of LiCoO2 into nanosheets and reassembly into functional Li-ion battery cathodes
Source: Royal Society of Chemistry journal article supplement (doi:10.1039/c5ta09069e), 2016-01-01
Supplement: c5ta09069e1.pdf [file c5ta09069e1.pdf]

*Electronic Supplementary Information (ESI) for:*

## Oxidation-Reduction Assisted Exfoliation of $\text{LiCoO}_2$ into Nanosheets and Reassembly into Functional Li-ion Battery Cathodes

Qian Cheng, Ting Yang, Ying Li, Man Li and Candace K. Chan\*

Materials Science and Engineering  
School for Engineering of Matter, Transport and Energy  
Arizona State University, Tempe, AZ 85287  
\*candace.chan@asu.edu

### Materials Characterization

XRD characterization was performed with monochromatic Cu K $\alpha$  radiation ( $\lambda = 1.5405 \text{ \AA}$ , Panalytical X'pert Pro). Field emission scanning electron microscopy (SEM, XL30) was used to examine the morphology of reassembled LCO particles.

Multiple-collector inductively coupled plasma mass spectrometry (iCaP Q ICP-MS, Thermo Scientific) was used to analyze the composition of the LCO after charging (sample II in Scheme 1), after exfoliation in TEA solution (sample IV), after electrophoresis (sample VI), and after reassembly (sample VII). different LCO samples. To obtain sample IV, the solution containing LCO suspended in TEA was centrifuged at 5000 rpm to remove the unexfoliated LCO particles, followed by vacuum-filtration through a  $0.22 \text{ }\mu\text{m}$  PVDF filter membrane (Sigma-Aldrich, Durapore) to obtain only nanosheets. All of the samples were digested with 70% nitric acid (trace metal grade) at  $160 \text{ }^\circ\text{C}$  and 300 psi using a microwave hydrothermal reactor (Discover-SP, 909150).

For thermal gravimetric analysis, the LCO nanosheets were recovered from the TEA solution using centrifugation and the sample was dried in air at  $105 \text{ }^\circ\text{C}$  overnight. The sample (9.82 mg) was placed in a silicon crucible that was suspended from the arm of a microbalance. The crucible was then heated in a vertical tube furnace (Setaram TG 92) to  $1000 \text{ }^\circ\text{C}$  with a ramp rate of  $0.15 \text{ }^\circ\text{C/sec}$  in oxygen and the change in mass was recorded.

For Raman spectroscopy, the nanosheets were recovered from the TEA solution using centrifugation ( $>14,000$  rpm for half an hour) and dried at  $50\text{ }^{\circ}\text{C}$ . Raman spectra were collected with a  $532\text{ nm}$  laser and a triple-grating monochromator (SpectraPro 300i, Action Research). The laser beam was focused onto the sample through a Mitutoyo M Plan Apo 50X objective with  $0.42\text{ N.A.}$  Measuring powers at the samples were  $230\text{ }\mu\text{W}$  and  $47\text{ }\mu\text{W}$  for bulk LCO and LCO nanosheets respectively, and all spectra were collected with an exposure times of  $60\text{ s}$  and  $20$  scans.

To prepare samples for TEM characterization, the nanosheet dispersion was centrifuged at  $5000\text{ rpm}$  to remove the unexfoliated particles first. Then, the LCO nanosheets were separated from the aqueous TEA solutions using centrifugation at  $14,000\text{ rpm}$  (Microfuge, I8) and collected from the decanted phase. The recovered LCO nanosheets were re-dispersed in isopropanol (LCO IPA dispersion) by sonicating with a tip probe sonicator (CPX 600,  $660\text{ W}$ ) for  $10\text{ min}$  and dropped onto a Cu grid for TEM characterization (JEOL 2010F) under  $200\text{ keV}$ .

For AFM characterization, the LCO IPA dispersion was drop cast onto clean silicon substrates using spin coating at  $600\text{ rpm}$ . The silicon substrate was sonicated in DI water, ethanol, and acetone for  $30$  minutes separately to clean the surface. AFM measurements were performed using an Asylum Research (MFP 3D, classic) microscope with tapping mode.

## Electrochemical Testing

**Cyclic voltammetry (CV):** The as-prepared TEA-nanosheet dispersion was washed using dialysis in DI water first, then centrifuged at  $14000\text{ rpm}$  to separate the nanosheets. This sample was then re-dispersed in *N*-methyl-2-pyrrolidone (NMP, Sigma Aldrich). Nanosheets collected from the anode after electrophoresis were re-dispersed in NMP directly. Polyvinylidene difluoride (PVDF, Sigma Aldrich) and graphite (C-NERGY, KS-6) were added into the nanosheet/NMP slurries with a ratio of  $7:2:1$  by weight. The slurry was coated onto Al foil using a doctor blade, then heated at  $110\text{ }^{\circ}\text{C}$  for at least  $12$  hours until completely dry. The acquired electrode was assembled into a pouch cell with Li metal as the counter electrode.  $1\text{ M LiPF}_6$  in EC/DMC/DEC ( $4:2:4$ ) was used as the electrolyte (MTI Corp) and the separator was monoPE from Celgard. The CV measurements were performed using a potentiostat (Biologic MPG2) with a scan rate of  $1\text{ mV/s}$ .

**Galvanostatic cycling:** The LCO active material was mixed with graphite and PVDF with a weight ratio of  $8:1:1$ . The electrode and pouch cells were prepared as described before. Galvanostatic cycling was performed using a  $0.2\text{ C}$  rate ( $25\text{ mA/g}$ ) from  $4.3$  to  $3\text{ V}$  vs.  $\text{Li/Li}^+$  (MPG2, Biologic). Differential capacity analysis was performed using the EC-lab software from Biologic.

## Supporting Tables

**Table S1.** The redox potential for  $\text{OH}^-/\text{O}_2$  in the different concentrations of TEA-OH solution, showing the feasibility of  $\text{OH}^-$  oxidation by the LCO electrode after it was charged to 4.3 V vs.  $\text{Li}/\text{Li}^+$ .

| TEA: $V_{\text{Li}^+}$ | Concentration of TEA-OH (mM) | Solution pH | Redox potential of $\text{OH}^-/\text{O}_2$ |                               |
|------------------------|------------------------------|-------------|---------------------------------------------|-------------------------------|
|                        |                              |             | V vs. NHE                                   | V vs. $\text{Li}/\text{Li}^+$ |
| 10                     | 166.2                        | 13.65       | 0.42                                        | 3.46                          |
| 5                      | 83.1                         | 13.40       | 0.44                                        | 3.48                          |
| 2                      | 33.2                         | 13.09       | 0.46                                        | 3.50                          |
| 1                      | 16.6                         | 12.83       | 0.47                                        | 3.51                          |
| 0.5                    | 8.3                          | 12.55       | 0.49                                        | 3.53                          |

## Supporting Figures

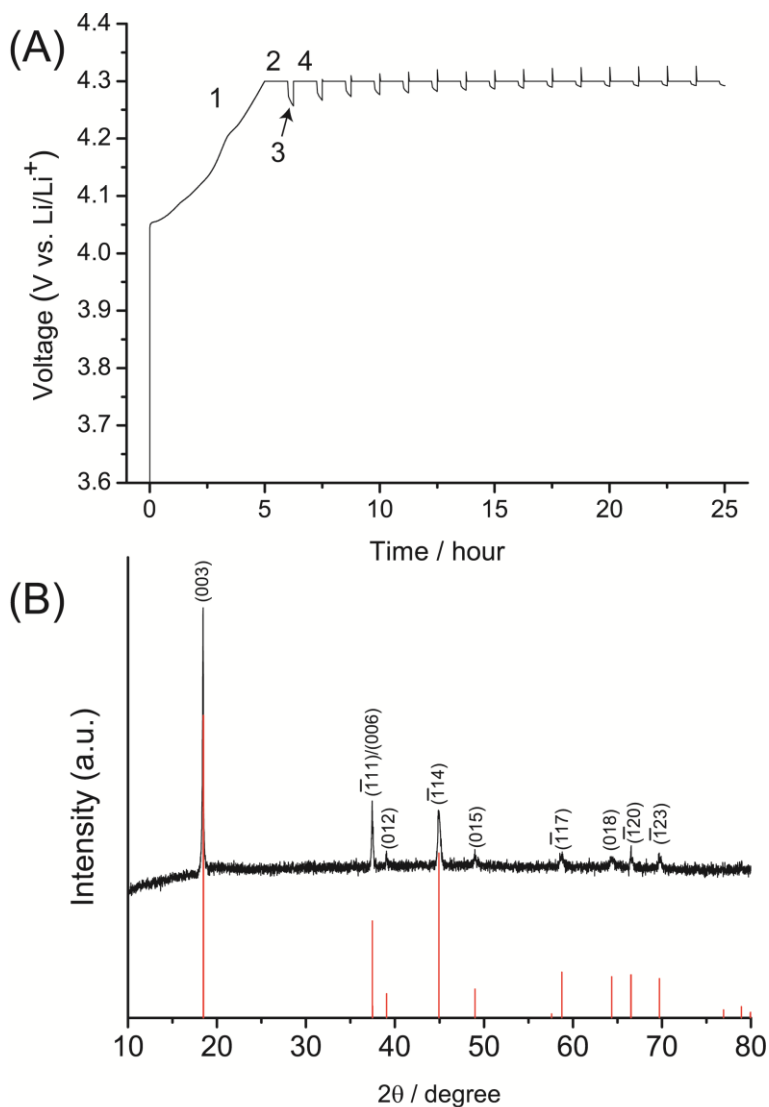

**Figure S1.** (A) Voltage vs. time plot of the charging process used to oxidize LiCoO<sub>2</sub>. In region 1, the electrode was charged galvanostatically at 0.05 C until 4.3 V vs. Li/Li<sup>+</sup>. Then the electrode was held at 4.3 V for 1 hour (region 2), followed by a 15 minute rest at open circuit (region 3) and another 1 hour hold at 4.3 V (region 4) if the open circuit voltage was less than 4.29 V. This was repeated for approximately 1 day until the open circuit voltage was higher than 4.29 V. (B) XRD pattern of the delithiated Li<sub>1-x</sub>CoO<sub>2</sub> particles, matching the reference pattern for Li<sub>0.5</sub>CoO<sub>2</sub> (from ref. 20 in the manuscript).

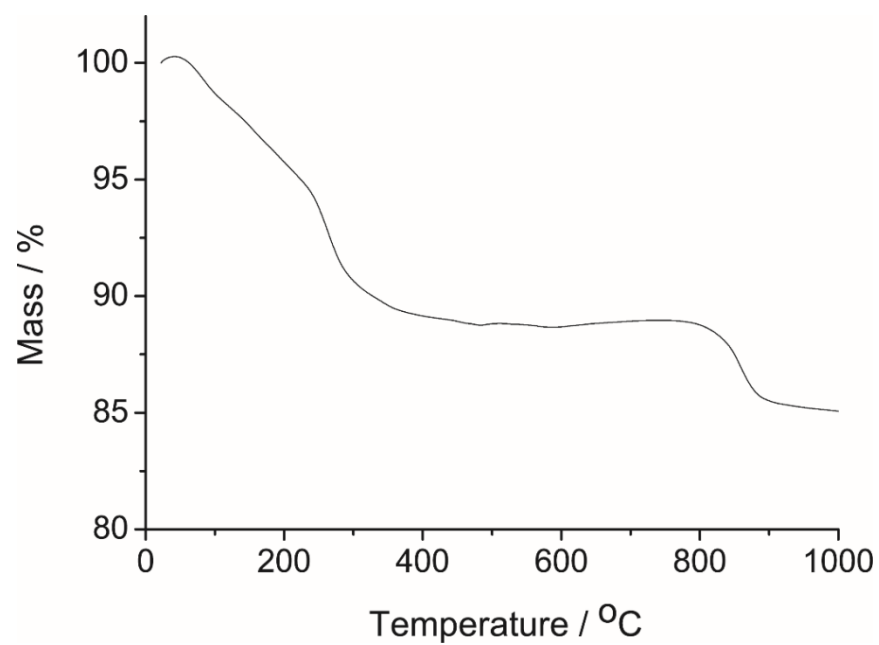

**Figure S2.** Thermal gravimetric analysis of the LCO nanosheets that were recovered from the TEA solution (TEA:  $V_{Li^+} = 1$ ) using centrifugation. At 500 °C the mass loss was 11.2%.

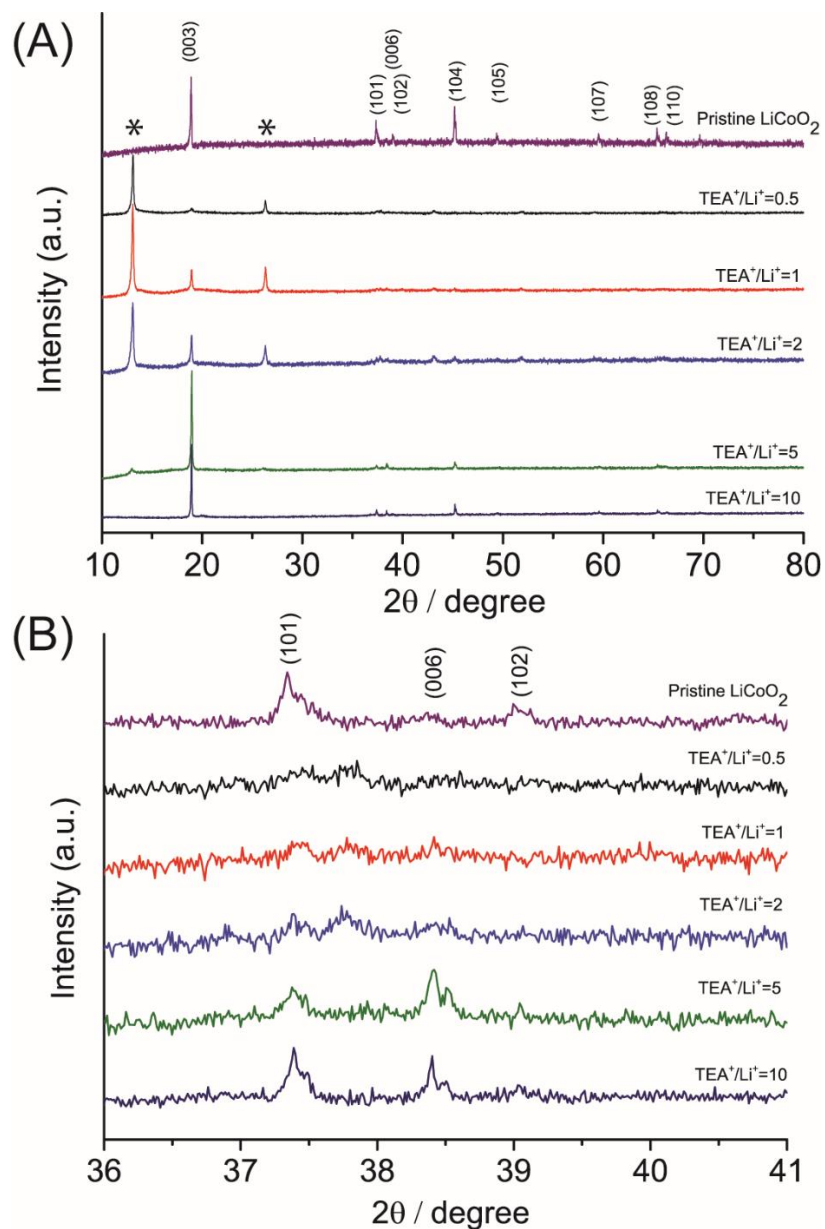

**Figure S3.** (A) XRD of pristine LCO (O3-type) and unexfoliated LCO obtained after sonication and centrifugation in different  $\text{TEA}^+:\text{V}_{\text{Li}^+}$  of 0.5, 1, 2, 5, and 10. Planes from O3-LCO are labelled and asterisks indicate peaks for the LCO intercalated with  $\text{TEA}^+$ ; (B) Zoom-in of XRD patterns from  $35^\circ < 2\theta < 40^\circ$ .

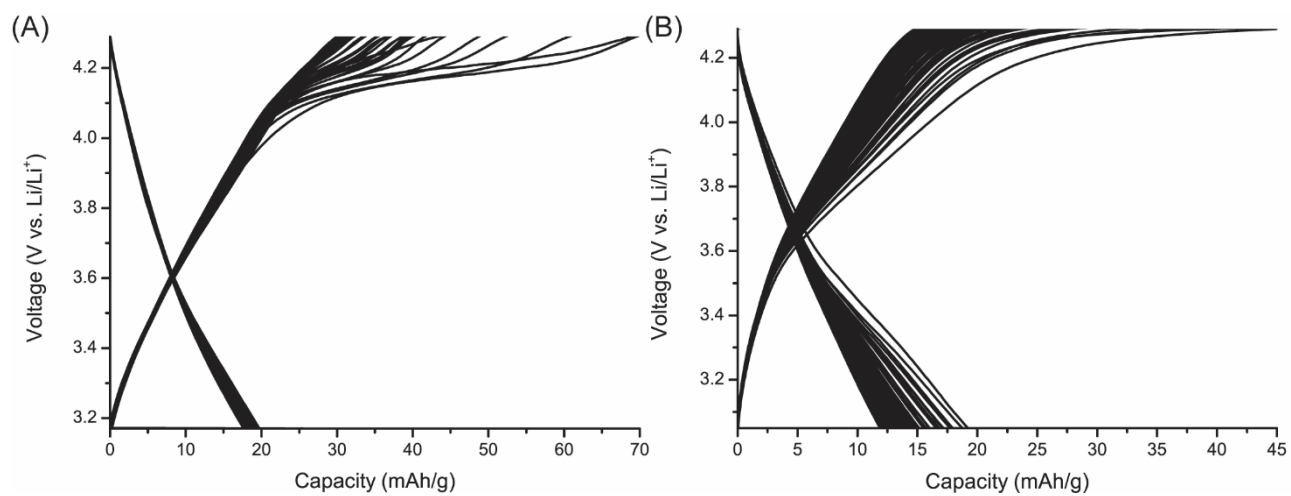

**Figure S4.** Galvanostatic cycling data of nanosheets (A) after dialysis in DI water, (B) after restacking through dialysis in 1M  $\text{LiNO}_3$ . Fifty charge/discharge cycles are shown for both materials.

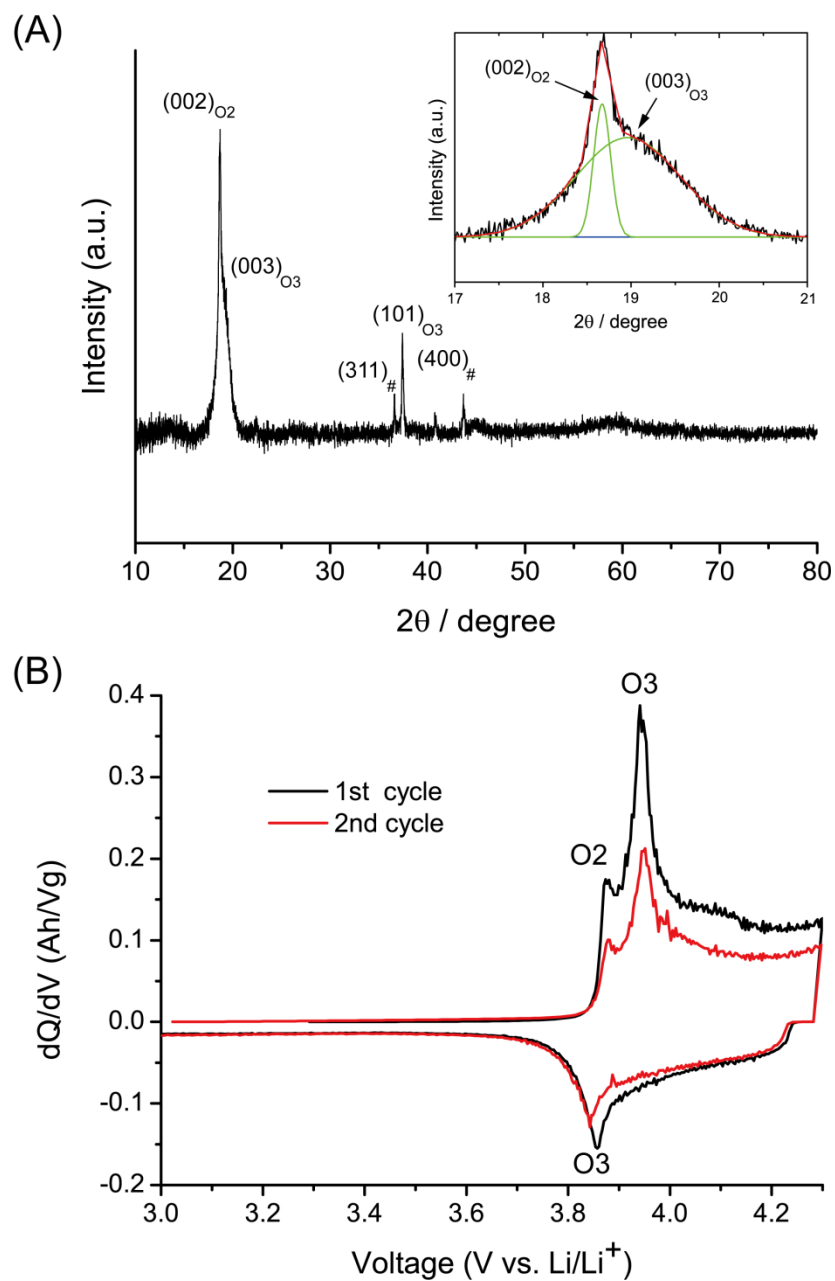

**Figure S5.** Characterization of LCO particles reassembled after electrophoresis and microwave hydrothermal treatment in LiOH without annealing. (A) XRD with inset showing fitting results to O2 and O3-LCO reflections; #:  $\text{Co}_3\text{O}_4$ . (B) Differential capacity vs. potential plot obtained from galvanostatic measurement showing delithiation from O2 and O3-LCO.

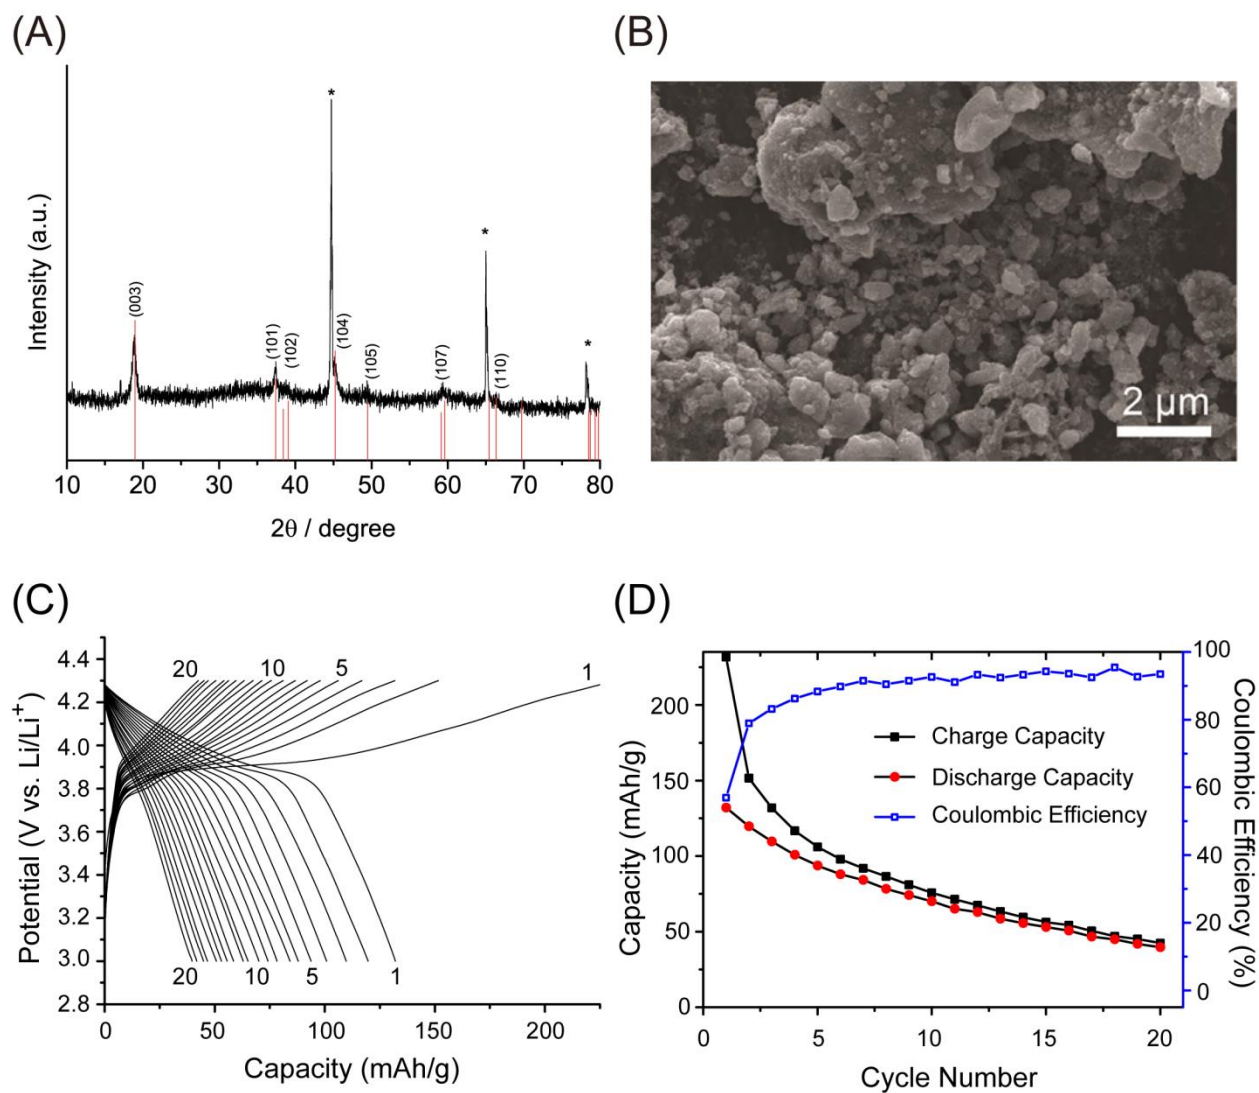

**Figure S6.** Characterization of reassembled LCO particles obtained after purification by electrophoresis, microwave hydrothermal treatment, and annealing at 500 °C for 2 hours. (A) XRD pattern matching O3-LCO; \* indicate peaks from Al foil substrate. (B) SEM images. (C) Galvanostatic cycling data between 3.0 - 4.3 V vs.  $\text{Li/Li}^+$ . (D) Coulombic efficiency and charge/discharge capacity for each cycle.

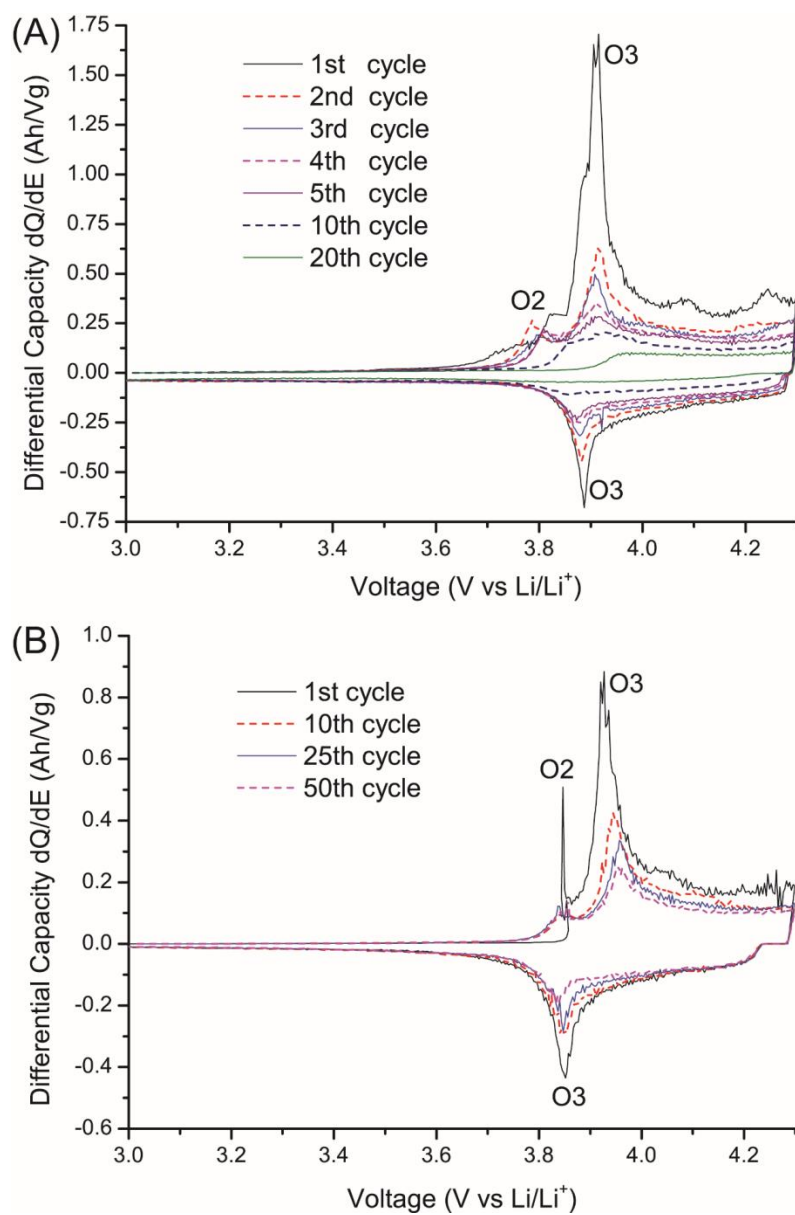

**Figure S7.** Differential capacity vs. voltage plot of LCO reassembled particles (A) without ALD coating and (B) with  $\text{Al}_2\text{O}_3$  ALD coating.
